# Supplementary material for: Evaluation of urban-rural differences in pharmacy practice needs in Maine with the MaPPNA
Source: PubMed Central journal article supplement — Pharm Pract (Granada). 2015 Dec 15;13(4):669. doi: 10.18549/PharmPract.2015.04.669 (PMC4696125; doi:10.18549/pharmpract.2015.04.669), 2015-12-15
Supplement: pharmpract-13-669-suppl.pdf [file pharmpract-13-669-suppl.pdf]

**Greetings from Husson University School of Pharmacy!**

**With Maine being among the most rural and “oldest” states in the nation, the pharmacy practice needs of our state may slightly differ from other states. We believe that identifying these needs will allow us to advance pharmacy practice and better serve our patient populations. We herein ask your help in determining the general pharmacy practice needs in the State of Maine.**

**As an incentive for participation and to show our appreciation, we offer each survey respondent a \$5 gas card, and a chance to win one of five \$50 cards. Thank you for your time and your valuable input as one of Maine's pharmacy practitioners in these exciting times as healthcare continues to evolve.**

**Your participation in this survey research is voluntary. The data collected will be both anonymous and confidential (contact information for incentives is separate from the survey and cannot be linked to it). If you refuse to participate, there are no penalties or loss of benefits or services that you are otherwise entitled to. If you decide to participate and then withdraw there are no penalties or loss of benefits or services. Whether or not you choose to participate in this project will have no effect on your relationship with Husson University School of Pharmacy now or in the future. Your participation indicates your consent.**

\* 1. What is your primary practice setting?

- Large retail chain
- Private / independent retail
- In-patient hospital care
- Ambulatory care
- Other (please specify)

\* 2. What is your primary responsibility?

- Staff pharmacist
- Management / supervisory (PIC)
- Administration (regional / pharmacy director)
- Pharmacy store owner
- Other (please specify)

3. Which of the following credentials have you earned?

- R.Ph.
- PharmD
- Board Certification
- MBA
- JD
- Other (please specify)

4. How many years have you been practicing pharmacy? (please pick the best answer)

5. What is your gender?

- Female
- Male
- Other

\* 6. What is the zip code (or town name) of your primary practice location?

\* 7. Approximately what percentage of your **current** patient population do you believe is from a rural location?

- < 10%
- 10% to 25%
- 26% to 50%
- 51% to 75%
- 76% to 100%

\* 8. Which statement is most true for you?

- I have worked as a pharmacist in rural locations only
- I have worked as a pharmacist in urban locations only
- I have worked as a pharmacist in both rural and urban locations

## Potential Pharmacy Practice Needs

**Questions 9 - 14 are current practice issues that have been identified during an informal survey of your peers. To what extent do you agree or disagree that the following are challenges in your practice?**



\* 12. Poly-pharmacy

|                                                   | Strongly Disagree     | Disagree              | Slightly Disagree     | Slightly Agree        | Agree                 | Strongly Agree        | N/A                   |
|---------------------------------------------------|-----------------------|-----------------------|-----------------------|-----------------------|-----------------------|-----------------------|-----------------------|
| Limited opportunity for medication reconciliation | <input type="radio"/> |
| Limited opportunity for follow-up with patient    | <input type="radio"/> |
| Inadequate discharge teaching from the hospital   | <input type="radio"/> |

\* 13. Special populations: To what extent do you feel that the following populations require additional time / considerations / accommodations from your practice?

|                                           | Strongly Disagree     | Disagree              | Slightly Disagree     | Slightly Agree        | Agree                 | Strongly Agree        | N/A                   |
|-------------------------------------------|-----------------------|-----------------------|-----------------------|-----------------------|-----------------------|-----------------------|-----------------------|
| Older adults                              | <input type="radio"/> |
| Migrant workers                           | <input type="radio"/> |
| Veterans                                  | <input type="radio"/> |
| Patients with mental disabilities         | <input type="radio"/> |
| Patients with physical disabilities       | <input type="radio"/> |
| Patients with low health literacy         | <input type="radio"/> |
| Patients with substance abuse / addiction | <input type="radio"/> |

\* 14. Resources at your pharmacy: To what extent do you agree or disagree your practice would benefit from the following ...

|                                 | Strongly Disagree     | Disagree              | Slightly Disagree     | Slightly Agree        | Agree                 | Strongly Agree        | N/A                   |
|---------------------------------|-----------------------|-----------------------|-----------------------|-----------------------|-----------------------|-----------------------|-----------------------|
| More drug information           | <input type="radio"/> |
| More staffing                   | <input type="radio"/> |
| Larger inventory of medications | <input type="radio"/> |
| Tele-pharmacy                   | <input type="radio"/> |

15. Please feel free to comment regarding pharmacy practice needs identified above or any others that come to mind. Thank you.

## Hot topics

**Maine offers a few new programs related to pharmacy practice, and we would like to know your view of these programs. Please take a minute to answer our last page before opting whether to enter our raffle for a \$50 gas card.**

### 16. Collaborative Care Act (CCA)

|                                                                                                          | Strongly Disagree     | Disagree              | Slightly Disagree     | Slightly Agree        | Agree                 | Strongly Agree        |
|----------------------------------------------------------------------------------------------------------|-----------------------|-----------------------|-----------------------|-----------------------|-----------------------|-----------------------|
| I am familiar with this program                                                                          | <input type="radio"/> |
| I have a favorable opinion of this program.<br>(Leave this row blank if you are unfamiliar with the CCA) | <input type="radio"/> |

Comments related to the CCA welcome:

### 17. Drug Take-Back Program (DTB)

|                                                                                                          | Strongly Disagree     | Disagree              | Slightly Disagree     | Slightly Agree        | Agree                 | Strongly Agree        |
|----------------------------------------------------------------------------------------------------------|-----------------------|-----------------------|-----------------------|-----------------------|-----------------------|-----------------------|
| I am familiar with this program                                                                          | <input type="radio"/> |
| I have a favorable opinion of this program.<br>(Leave this row blank if you are unfamiliar with the DTB) | <input type="radio"/> |

Comments related to the DTB welcome:

### 18. Medication Therapy Management (MTM)

|                                                                                           | Strongly Disagree     | Disagree              | Slightly Disagree     | Slightly Agree        | Agree                 | Strongly Agree        |
|-------------------------------------------------------------------------------------------|-----------------------|-----------------------|-----------------------|-----------------------|-----------------------|-----------------------|
| In my practice, we use MTM all the time                                                   | <input type="radio"/> |
| I have a favorable opinion of MTM. (Leave this row blank if you are unfamiliar with MTM). | <input type="radio"/> |

Comments related to MTM welcome:

### 19. Prescription Monitoring Program (PMP)

|                                             | Strongly Disagree     | Disagree              | Slightly Disagree     | Slightly Agree        | Agree                 | Strongly Agree        |
|---------------------------------------------|-----------------------|-----------------------|-----------------------|-----------------------|-----------------------|-----------------------|
| In my practice, we use the PMP all the time | <input type="radio"/> |

I have a favorable opinion of the PMP. (Leave this row blank if you are unfamiliar with the PMP)

|                       |                       |                       |                       |                       |                       |                       |
|-----------------------|-----------------------|-----------------------|-----------------------|-----------------------|-----------------------|-----------------------|
| <input type="radio"/> |
|-----------------------|-----------------------|-----------------------|-----------------------|-----------------------|-----------------------|-----------------------|

Comments related to the PMP welcome:

Thank you for participating in our survey. Your contributions will help better define pharmacy practice needs in the state of Maine. As a token of our appreciation, when you hit the "done" button, you will be taken to a separate survey designed to collect your contact info and enter you into the raffle. The contact info you provide will be used to mail you your gas card. That info cannot and will not be linked back to the responses provided in this survey. Furthermore, providing the contact info is completely optional.
